# Supplementary material for: Strengthening patient-centred communication in rural Ugandan health centres: A theory-driven evaluation within a cluster randomized trial
Source: PubMed Central journal article supplement — Evaluation (Lond). 2014 Oct;20(4):471–91. doi: 10.1177/1356389014551484 (PMC4425297; doi:10.1177/1356389014551484), 2014-10
Supplement: Supplementary_File_2._Tables_of_participant_characteristics_and_univariate_analyses.pdf [file Supplementary_File_2._Tables_of_participant_characteristics_and_univariate_analyses.pdf]

**Table A. Characteristics of health worker participants in the standard care and intervention health facilities.**

| Health worker characteristic                   | Baseline                |                        | Immediately after intervention |                        |
|------------------------------------------------|-------------------------|------------------------|--------------------------------|------------------------|
|                                                | Standard care<br>(n=10) | Intervention<br>(n=12) | Standard care<br>(n=12)        | Intervention<br>(n=14) |
| Position                                       |                         |                        |                                |                        |
| In-charge                                      | 10 (100%)               | 7 (58%)                | 10 (83%)                       | 8 (57%)                |
| Nurse/Midwife                                  | 0                       | 3 (25%)                | 1 (8%)                         | 4 (29%)                |
| Nursing aide/assistant                         | 0                       | 2 (17%)                | 1 (8%)                         | 2 (14%)                |
| Gender                                         |                         |                        |                                |                        |
| Male                                           | 6 (60%)                 | 6 (50%)                | 8 (67%)                        | 7 (50%)                |
| Female                                         | 4 (40%)                 | 6 (50%)                | 4 (33%)                        | 7 (50%)                |
| Age                                            |                         |                        |                                |                        |
| <30years                                       | 3 (30%)                 | 2 (17%)                | 5 (42%)                        | 3 (21%)                |
| 30-44 years                                    | 3 (30%)                 | 5(42%)                 | 3 (25%)                        | 6 (43%)                |
| 45+years                                       | 4 (40%)                 | 5(42%)                 | 4 (33%)                        | 5 (36%)                |
| Originally from study area                     |                         |                        |                                |                        |
| Yes                                            | 7 (70%)                 | 8 (67%)                | 8 (67%)                        | 9 (64%)                |
| No                                             | 3 (30%)                 | 4 (33%)                | 4 (33%)                        | 5 (36%)                |
| Years worked at the job                        |                         |                        |                                |                        |
| Under 5 years                                  | 4 (40%)                 | 3 (25%)                | 6 (50%)                        | 3 (21%)                |
| 5-9 years                                      | 3 (30%)                 | 4 (33%)                | 3 (25%)                        | 5 (36%)                |
| 10+ years                                      | 3 (30%)                 | 5 (42%)                | 3 (25%)                        | 6 (43%)                |
| Highest level of education                     |                         |                        |                                |                        |
| Certificate                                    | 7 (70%)                 | 10 (83%)               | 9 (75%)                        | 11 (79%)               |
| Diploma                                        | 3 (30%)                 | 1 (8%)                 | 3 (25%)                        | 1 (7%)                 |
| Bachelor's degree                              | 0                       | 1(8%)                  | 0                              | 2 (14%)                |
| Year graduated                                 |                         |                        |                                |                        |
| Before 1990                                    | 3 (30%)                 | 1 (8%)                 | 3 (25%)                        | 1 (7.1%)               |
| 1990-1999                                      | 0                       | 4 (33%)                | 0                              | 4 (28.6%)              |
| Since 2000                                     | 7 (70%)                 | 7 (58%)                | 9 (75%)                        | 9 (64.3%)              |
| Language skills                                |                         |                        |                                |                        |
| Japadhola+ Swahilli+ Another<br>local language | 8 (80%)                 | 9(75%)                 | 8 (67%)                        | 11(79%)                |
| Japadhola + Swahilli only                      | 0                       | 1(8%)                  | 1 (8%)                         | 1(7%)                  |
| Japadhola only                                 | 2 (20%)                 | 2(17%)                 | 3 (25%)                        | 2(14%)                 |

**Table B. Characteristics of health care seekers in the standard care and intervention health facilities.**

| Care seeker characteristics                   | Baseline                |                        | Immediately after intervention |                         |
|-----------------------------------------------|-------------------------|------------------------|--------------------------------|-------------------------|
|                                               | Standard care<br>(n=47) | Intervention<br>(n=53) | Standard care<br>(n=96)        | Intervention<br>(n=117) |
| Care seeker age                               |                         |                        |                                |                         |
| <30years                                      | 33 (70%)                | 37 (70%)               | 62 (65%)                       | 79 (68%)                |
| 30-44 years                                   | 12 (26%)                | 13 (23%)               | 31 (32%)                       | 30 (26%)                |
| 45+years                                      | 2 (4%)                  | 4(8%)                  | 3 (3%)                         | 8 (7%)                  |
| Gender                                        |                         |                        |                                |                         |
| Male                                          | 1 (2%)                  | 4(8%)                  | 3 (3%)                         | 6 (5%)                  |
| Female                                        | 46 (98%)                | 49(92%)                | 93 (97%)                       | 111 (95%)               |
| Care seeker been to this health centre before |                         |                        |                                |                         |
| Yes                                           | 46(98%)                 | 47(89%)                | 94(98%)                        | 103(88%)                |
| No                                            | 1(2%)                   | 6(11%)                 | 2(2%)                          | 14(12%)                 |
| Originally from study area                    |                         |                        |                                |                         |
| Yes                                           | 43 (91%)                | 47 (89%)               | 86 (90%)                       | 104 (89%)               |
| No                                            | 4 (9%)                  | 6(11%)                 | 10 (10%)                       | 13 (11%)                |
| Highest level of education                    |                         |                        |                                |                         |
| None                                          | 10 (21%)                | 15 (28%)               | 24 (25%)                       | 30 (26%)                |
| Primary (P.1 –P.7)                            | 33 (70%)                | 29 (55%)               | 62 (65%)                       | 63 (54%)                |
| Secondary (S.1-S.6)                           | 4 (9%)                  | 9(17%)                 | 10 (10%)                       | 23 (20%)                |
| Diploma                                       | 0                       | 0                      | 0                              | 1 (1%)                  |
| Primary working activity                      |                         |                        |                                |                         |
| Unemployed                                    | 0                       | 3(6%)                  | 2 (2%)                         | 3 (3%)                  |
| Housewife/stay home mother                    | 2 (4%)                  | 3(6%)                  | 3 (3%)                         | 9 (8%)                  |
| Peasant farmer                                | 42(89%)                 | 42 (79%)               | 86 (90%)                       | 96 (82%)                |
| Small business owner                          | 3(6%)                   | 2 (4%)                 | 4 (4%)                         | 6 (5%)                  |
| Other                                         | 0                       | 3(6%)                  | 1 (1%)                         | 3 (3%)                  |
| <b>Patient characteristics</b>                |                         |                        |                                |                         |
| Age                                           |                         |                        |                                |                         |
| 6 months and under                            | 14 (30%)                | 8(15%)                 | 29 (30%)                       | 24(21%)                 |
| 7-12 months                                   | 5(11%)                  | 13(25%)                | 17(18%)                        | 26(22%)                 |
| 13-18 months                                  | 7(15%)                  | 9(17%)                 | 12(13%)                        | 21(18%)                 |
| 19-30 months                                  | 11(23%)                 | 16(30%)                | 23(24%)                        | 26(22%)                 |
| 31-60 months                                  | 10(21%)                 | 7(13%)                 | 15(16%)                        | 20(17%)                 |
| Gender                                        |                         |                        |                                |                         |
| Male                                          | 28(60%)                 | 21(40%)                | 56(58%)                        | 61(52%)                 |
| Female                                        | 19(40%)                 | 32(60%)                | 40(42%)                        | 56(48%)                 |
| Mother reports fever                          |                         |                        |                                |                         |
| Yes                                           | 47(100%)                | 53(100%)               | 96(100%)                       | 117(100%)               |
| No                                            | 0                       | 0                      | 0                              | 0                       |
| Mother reports cough                          |                         |                        |                                |                         |
| Yes                                           | 18(38%)                 | 38(72%)                | 51(53%)                        | 74(63%)                 |
| No                                            | 29(62%)                 | 15(28%)                | 45(47%)                        | 43(37%)                 |
| Mother reports vomiting                       |                         |                        |                                |                         |
| Yes                                           | 8(17%)                  | 11(21%)                | 23(24%)                        | 30(26%)                 |
| No                                            | 39(83%)                 | 42(79%)                | 73(76%)                        | 87(74%)                 |
| Mother reports flu                            |                         |                        |                                |                         |
| Yes                                           | 8(17%)                  | 20(38%)                | 28(29%)                        | 40(34%)                 |
| No                                            | 39(83%)                 | 33(62%)                | 68(71%)                        | 77(66%)                 |

**Table C. Baseline intra-class correlation coefficients for each measurement method at the health worker and health facility levels.**

| Outcome                                                  | Level of cluster | Number of patients | Number of clusters | Intraclass correlation coefficient |
|----------------------------------------------------------|------------------|--------------------|--------------------|------------------------------------|
| Communication score by care seeker rating                | Health worker    | 97                 | 22                 | 0.24                               |
|                                                          | Health facility  | 97                 | 20                 | 0.28                               |
| Communication score by audio-recorded interaction rating | Health worker    | 100                | 22                 | 0.31                               |
|                                                          | Health facility  | 100                | 20                 | 0.32                               |

**Table D. Univariate analyses of communication scores by health worker characteristic for each measurement method.**

| Health worker characteristic                   | Number (n) <sup>a</sup> | Care seeker assessment                                   |                    | Audio-recorded interaction assessment                   |                   |
|------------------------------------------------|-------------------------|----------------------------------------------------------|--------------------|---------------------------------------------------------|-------------------|
|                                                |                         | Exit interview score (95% CI <sup>b</sup> of difference) | P-value            | Audio-recorded interaction score (95% CI of difference) | P-value           |
| <b>Position at health centre</b>               |                         |                                                          |                    |                                                         |                   |
| In-charge                                      | 160                     | 79.8                                                     |                    | 14.3                                                    |                   |
| Nurse/midwife                                  | 33                      | 82.9 (77.6, 94.3)                                        | 0.47               | 14.7 (12.7, 17.4)                                       | 0.75              |
| Nursing aide                                   | 20                      | 79.5 (68.8, 89.4)                                        | 0.95               | 14.4 (11.6, 17.4)                                       | 0.94              |
| <b>Age</b>                                     |                         |                                                          |                    |                                                         |                   |
| <30 years                                      | 54                      | 79.3                                                     |                    | 14.8                                                    |                   |
| 30-44 years                                    | 75                      | 79.6 (72.0, 88.0)                                        |                    | 14.5 (12.1, 16.5)                                       |                   |
| 45+ years                                      | 84                      | 81.8 (76.4, 92.2)                                        | 0.52 <sup>c</sup>  | 14.0 (11.0, 15.3)                                       | 0.45 <sup>c</sup> |
| <b>Gender</b>                                  |                         |                                                          |                    |                                                         |                   |
| Male                                           | 115                     | 78.3                                                     |                    | 13.8                                                    |                   |
| Female                                         | 98                      | 79.7 (74.8, 87.4)                                        | 0.67               | 14.2 (12.9, 16.4)                                       | 0.63              |
| <b>Originally from area</b>                    |                         |                                                          |                    |                                                         |                   |
| No                                             | 64                      | 78.8                                                     |                    | 14.7                                                    |                   |
| Yes                                            | 149                     | 81.1 (76.7, 89.9)                                        | 0.50               | 14.2 (11.9, 15.5)                                       | 0.58              |
| <b>Duration as a health worker</b>             |                         |                                                          |                    |                                                         |                   |
| Under 5 years                                  | 70                      | 75.9                                                     |                    | 14.3                                                    |                   |
| 5-9 years                                      | 68                      | 79.1 (75.7, 88.8)                                        |                    | 15.7 (15.2, 19.0)                                       |                   |
| 10+ years                                      | 75                      | 85.8 (89.1, 102)                                         | 0.003 <sup>c</sup> | 13.2 (10.2, 13.9)                                       | 0.26 <sup>c</sup> |
| <b>Highest education</b>                       |                         |                                                          |                    |                                                         |                   |
| Certificate                                    | 165                     | 80.4                                                     |                    | 14.3                                                    |                   |
| Diploma                                        | 31                      | 79.9 (70.2, 88.4)                                        | 0.90               | 14.6 (12.3, 17.3)                                       | 0.84              |
| Bachelor's degree                              | 17                      | 80.0 (67.0, 92.3)                                        | 0.95               | 15.2 (12.8, 19.3)                                       | 0.60              |
| <b>Year Graduated</b>                          |                         |                                                          |                    |                                                         |                   |
| Before 1990                                    | 33                      | 84.2                                                     |                    | 13.5                                                    |                   |
| 1990-1999                                      | 38                      | 79.5 (63.7, 85.9)                                        |                    | 15.2 (14.0, 20.0)                                       |                   |
| Since 2000                                     | 142                     | 79.7 (66.3, 84.0)                                        | 0.38 <sup>c</sup>  | 14.4 (12.9, 17.7)                                       | 0.66 <sup>c</sup> |
| <b>Languages spoken</b>                        |                         |                                                          |                    |                                                         |                   |
| Japhadhola, Swahili and another local language | 156                     | 80.6                                                     |                    | 14.2                                                    |                   |
| Japhadhola and Swahili                         | 15                      | 72.7 (53.1, 76.5)                                        | 0.19               | 18.1 (19.1, 25.0)                                       | 0.01              |

---

|                 |    |                   |      |                   |      |
|-----------------|----|-------------------|------|-------------------|------|
| Japhadhola only | 42 | 82.0 (75.6, 91.1) | 0.73 | 13.8 (11.6, 15.4) | 0.74 |
|-----------------|----|-------------------|------|-------------------|------|

---

Note: adjusted for clustering at the health worker level. Between 3-5 patients sampled per health worker.

<sup>a</sup> Five patients lost between audio-recording and exit interview.

<sup>b</sup> Confidence Interval.

<sup>c</sup> Test for trend.

**Table E. Univariate analyses of communication scores by care seeker characteristics for each measurement method.**

| Care seeker characteristic            | Care seeker assessment  |                                                          |                   | Audio-recorded interaction assessment                   |                   |
|---------------------------------------|-------------------------|----------------------------------------------------------|-------------------|---------------------------------------------------------|-------------------|
|                                       | Number (n) <sup>a</sup> | Exit interview score (95% CI <sup>b</sup> of difference) | P-value           | Audio recorded interaction score (95% CI of difference) | P-value           |
| <b>Care seeker characteristic</b>     |                         |                                                          |                   |                                                         |                   |
| Age                                   |                         |                                                          |                   |                                                         |                   |
| <30 years                             | 141                     | 79.2                                                     |                   | 14.3                                                    |                   |
| 30-44 years                           | 61                      | 82.0 (80.8, 88.8)                                        |                   | 15.1 (14.6, 17.2)                                       |                   |
| 45+ years                             | 11                      | 86.1 (84.9, 101.3)                                       | 0.05 <sup>c</sup> | 12.4 (7.9, 13.1)                                        | 0.91 <sup>c</sup> |
| Gender                                |                         |                                                          |                   |                                                         |                   |
| Female                                | 204                     | 80.1                                                     |                   | 14.4                                                    |                   |
| Male                                  | 9                       | 85.4 (82, 99.4)                                          | 0.23              | 13.5 (9.6, 15.4)                                        | 0.52              |
| Been to health centre before          |                         |                                                          |                   |                                                         |                   |
| Yes                                   | 197                     | 80.6                                                     |                   | 14.3                                                    |                   |
| No                                    | 16                      | 76.7 (65.8, 79.9)                                        | 0.28              | 15.2 (13.8, 18.5)                                       | 0.44              |
| Originally from area                  |                         |                                                          |                   |                                                         |                   |
| Yes                                   | 190                     | 81.0                                                     |                   | 14.3                                                    |                   |
| No                                    | 23                      | 74.7 (62.6, 74.2)                                        | 0.03              | 14.8 (13.4, 17.2)                                       | 0.62              |
| Highest education achieved            |                         |                                                          |                   |                                                         |                   |
| None                                  | 54                      | 83.7                                                     |                   | 14.2                                                    |                   |
| Primary (P1-P7)                       | 125                     | 79.3 (70.7, 79.3)                                        | 0.05              | 14.4 (13.3, 16.1)                                       | 0.70              |
| Secondary (S1-S6)                     | 33                      | 78 (66.4, 78.1)                                          | 0.06              | 14.5 (13, 16.8)                                         | 0.79              |
| Certificate                           | 1                       | 86.1 (62.1, 115)                                         | 0.86              | 16.6 (10.4, 27.9)                                       | 0.58              |
| Primary working activity              |                         |                                                          |                   |                                                         |                   |
| Peasant farmer                        | 182                     | 81.2                                                     |                   | 14.5                                                    |                   |
| Housewife/stay home mother            | 12                      | 75.9 (62.8, 78.5)                                        | 0.19              | 13.8 (9, 17)                                            | 0.70              |
| Small business owner/worker           | 10                      | 79.3 (69.1, 85.8)                                        | 0.66              | 14 (11, 16)                                             | 0.69              |
| Unemployed                            | 5                       | 65.2 (36.1, 62.5)                                        | 0.02              | 11.7 (6, 11.6)                                          | 0.04              |
| Other                                 | 4                       | 70.3 (46.7, 72.2)                                        | 0.10              | 16.1 (13.4, 22)                                         | 0.47              |
| <b>Patient (child) characteristic</b> |                         |                                                          |                   |                                                         |                   |
| Age                                   |                         |                                                          |                   |                                                         |                   |
| 6 months and under                    | 53                      | 80.2                                                     |                   | 14.4                                                    |                   |
| 7-12 months                           | 43                      | 76.1 (66.7, 77.2)                                        |                   | 15.5 (14.8, 18.3)                                       |                   |
| 13-18 months                          | 33                      | 81.8 (77.8, 89.1)                                        |                   | 13.7 (11.1, 14.9)                                       |                   |
| 19-30 months                          | 49                      | 82.1 (78.9, 89.2)                                        |                   | 13.7 (11.3, 14.7)                                       |                   |
| 31-60 months                          | 35                      | 81.4 (76.8, 88.3)                                        | 0.19 <sup>c</sup> | 14.5 (12.7, 16.4)                                       | 0.47 <sup>c</sup> |
| Gender                                |                         |                                                          |                   |                                                         |                   |
| Male                                  | 117                     | 88.5                                                     |                   | 14.9                                                    |                   |
| Female                                | 96                      | 82.9 (73.8, 80.8)                                        | 0.001             | 14.5 (13, 15.4)                                         |                   |
| Mother reports fever                  |                         |                                                          |                   |                                                         |                   |
| No                                    | 0                       | -                                                        |                   | -                                                       |                   |
| Yes                                   | 213                     | 80.3                                                     | -                 | 14.4                                                    | -                 |
| Mother reports cough                  |                         |                                                          |                   |                                                         |                   |
| No                                    | 88                      | 80.3                                                     |                   | 13.8                                                    |                   |
| Yes                                   | 125                     | 80.3 (76.6, 83.9)                                        | 0.98              | 14.8 (14.6, 17)                                         | 0.10              |
| Mother reports vomiting               |                         |                                                          |                   |                                                         |                   |
| No                                    | 160                     | 79.9                                                     |                   | 14.4                                                    |                   |
| Yes                                   | 53                      | 81.6 (79.2, 87.6)                                        | 0.41              | 14.3 (12.8, 15.5)                                       | 0.83              |
| Mother reports flu                    |                         |                                                          |                   |                                                         |                   |
| No                                    | 145                     | 81.5                                                     |                   | 14.3                                                    |                   |
| Yes                                   | 68                      | 77.4 (69.4, 77.2)                                        | 0.04              | 14.7 (13.9, 16.5)                                       | 0.48              |

Note: adjusted for clustering at the health worker level. Between 3-5 patients sampled per health worker.

<sup>a</sup> Five patients lost between audio-recording and exit interview.

<sup>b</sup> Confidence Interval.

<sup>c</sup> Test for trend.
