# Supplementary material for: Strengthening patient-centred communication in rural Ugandan health centres: A theory-driven evaluation within a cluster randomized trial
Source: PubMed Central journal article supplement — Evaluation (Lond). 2014 Oct;20(4):471–91. doi: 10.1177/1356389014551484 (PMC4425297; doi:10.1177/1356389014551484), 2014-10
Supplement: Supplementary_File_3._Figure.pdf [file Supplementary_File_3._Figure.pdf]

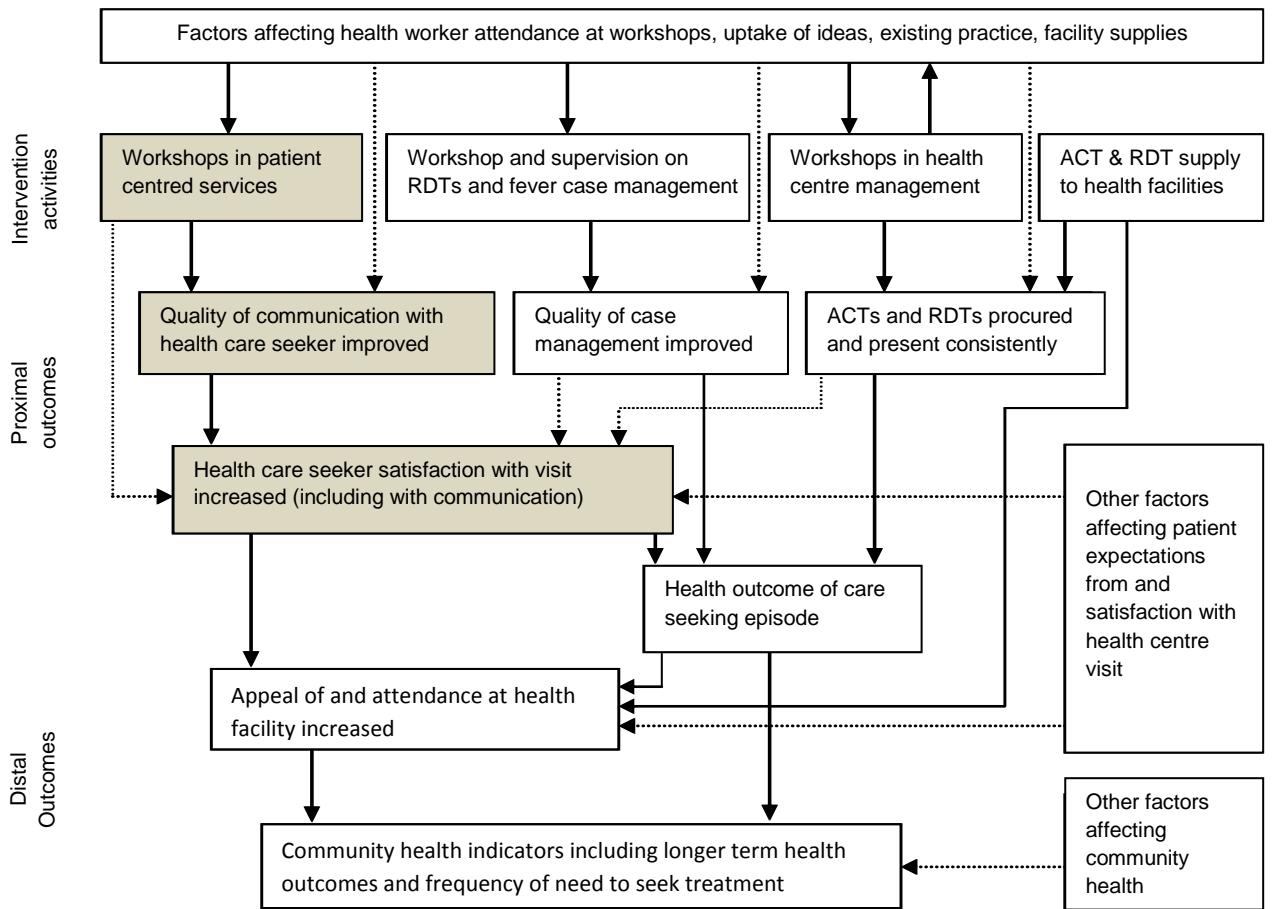

**Supplementary figure.** Simplified logic model of assumed mechanism of change following PRIME intervention.

*Note:* Shaded boxes indicate the high-level mechanism of change for Patient Centred Services evaluated in this paper. Dashed arrows indicate factors recognised to affect the intended change process, and which are captured as far as possible in evaluation activities.
